# Supplementary material
Source: PubMed Central journal article supplement (PMC5006707)
Supplement: supp_tpc.16.00304_TPC2016-00304-RAR1_Supplemental_Data.pdf [file supp_tpc.16.00304_TPC2016-00304-RAR1_Supplemental_Data.pdf]

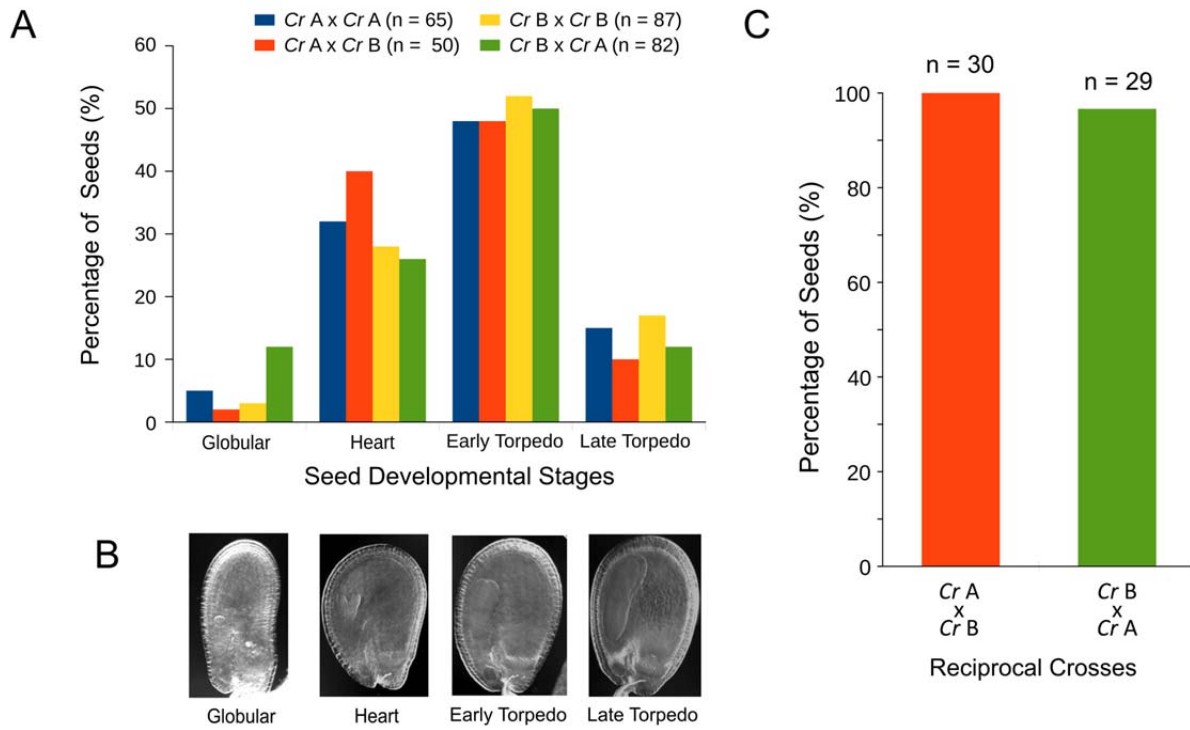

**Supplemental Figure 1. Analysis of hybrid seed development. (A)** Percentage of seeds at defined developmental stages at 6 days after pollination (DAP). **(B)** Cleared seeds at the indicated developmental stages. **(C)** Germination of hybrid seeds derived after reciprocal crosses.

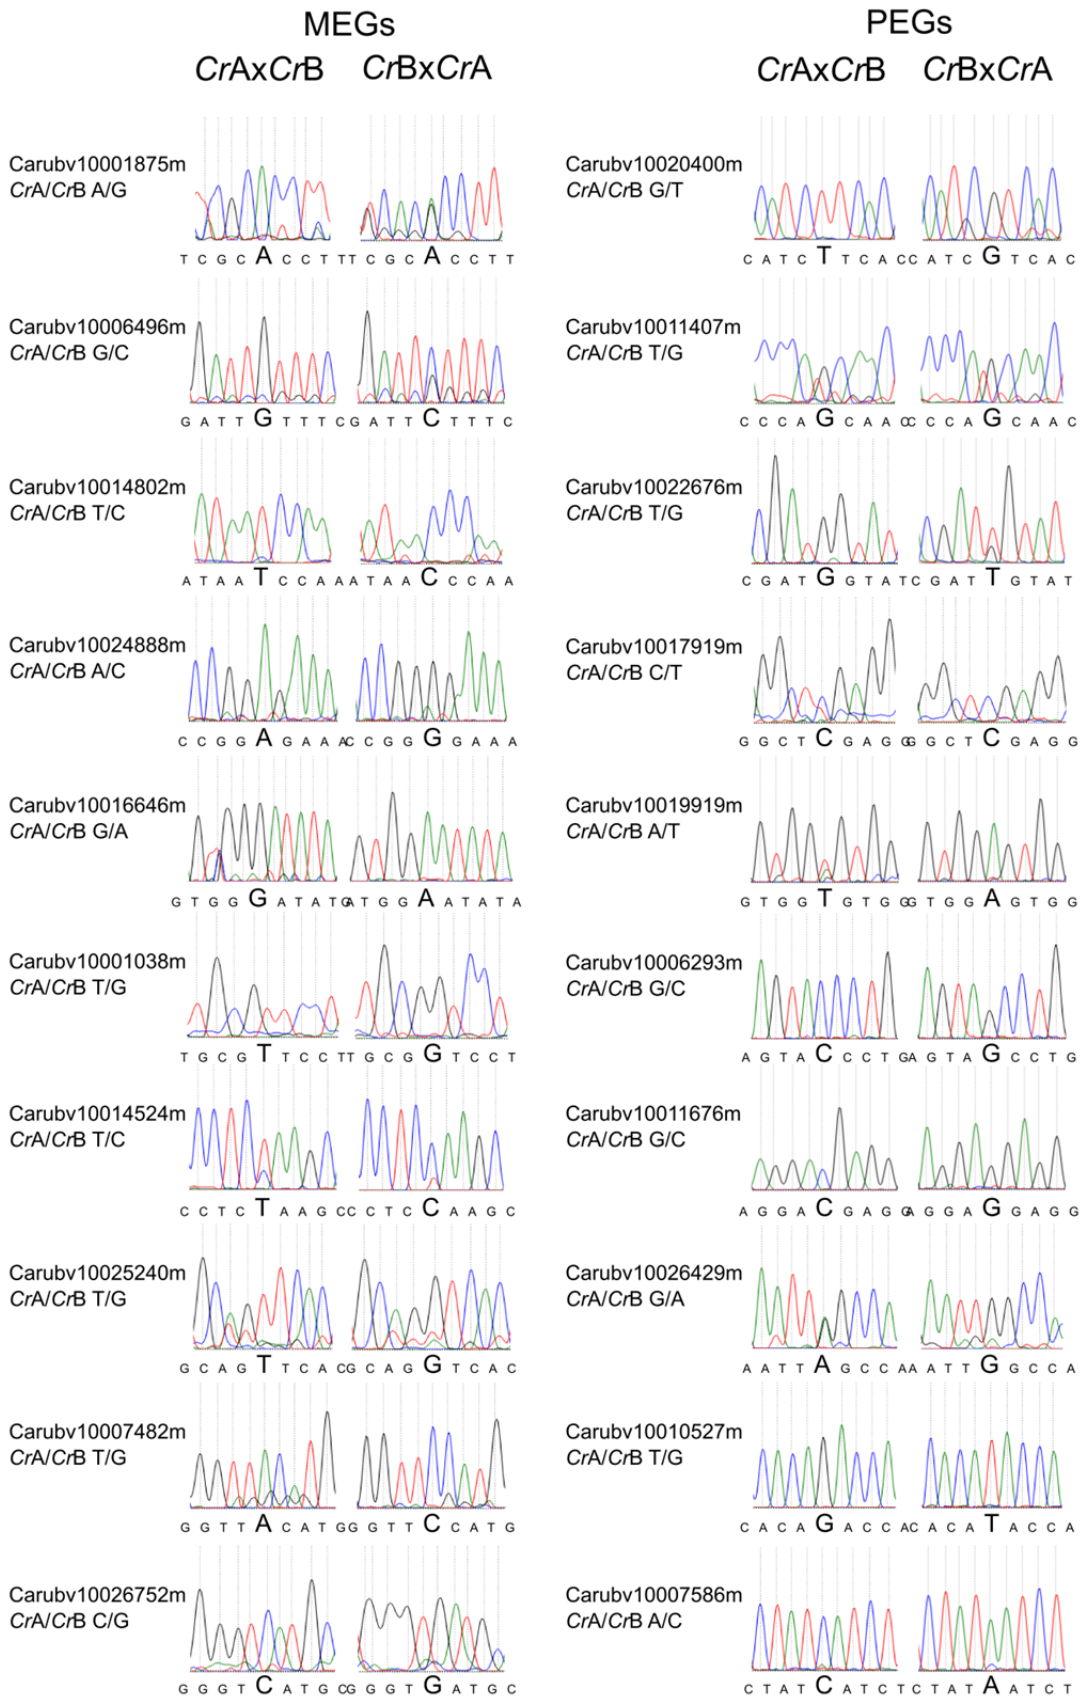

**Supplemental Figure 2. Confirmation of 10 selected MEGs and PEGs by Sanger sequencing of RT-PCR products.** The Sanger sequences of RT-PCR products of 10 randomly selected MEGs PEGs confirm the next generation sequencing results. The first two MEGs are imprinted only in one direction of the cross.

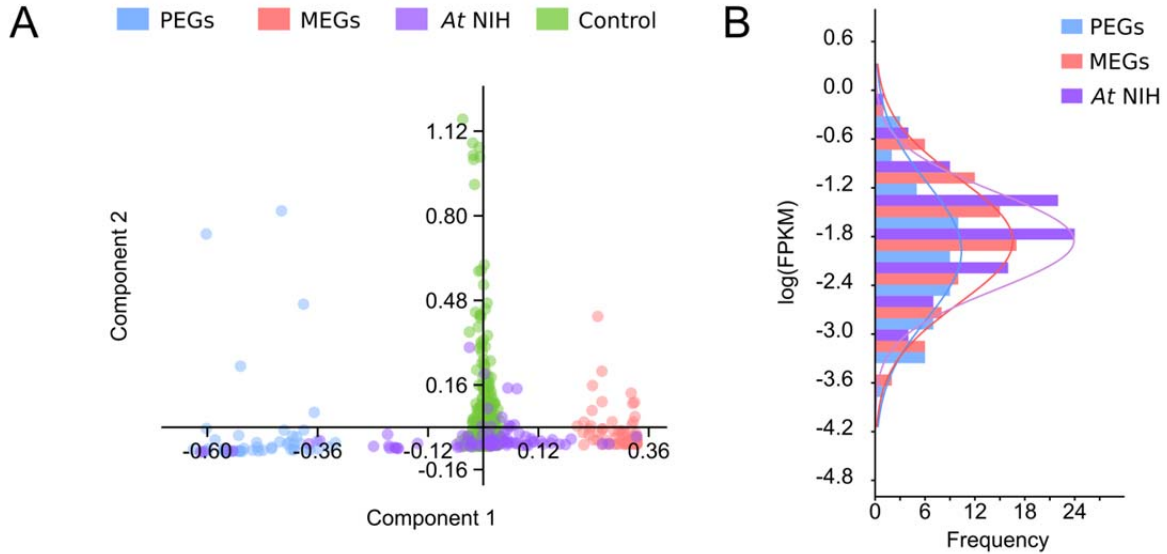

**Supplemental Figure 3. Principal Component Analysis (PCA) scatter plot for different categories of imprinted and non-imprinted genes in *C. rubella*.** (A) PCA using maternal informative allele to total informative allele ratio (M/T) and FPKM data for each gene. At NIH: Homologs of imprinted *A. thaliana* genes that have been classified as non-imprinted in *C. rubella*, Control: Non-imprinted control. (B) log expression level (FPKM) of different categories of genes. At NIH: Homologs of imprinted *A. thaliana* genes that have been classified as non-imprinted in *C. rubella*. Expression level of all genes in these three categories is not significantly different (Mann-Whitney pairwise test,  $p\text{-val} > 0.10$ ).

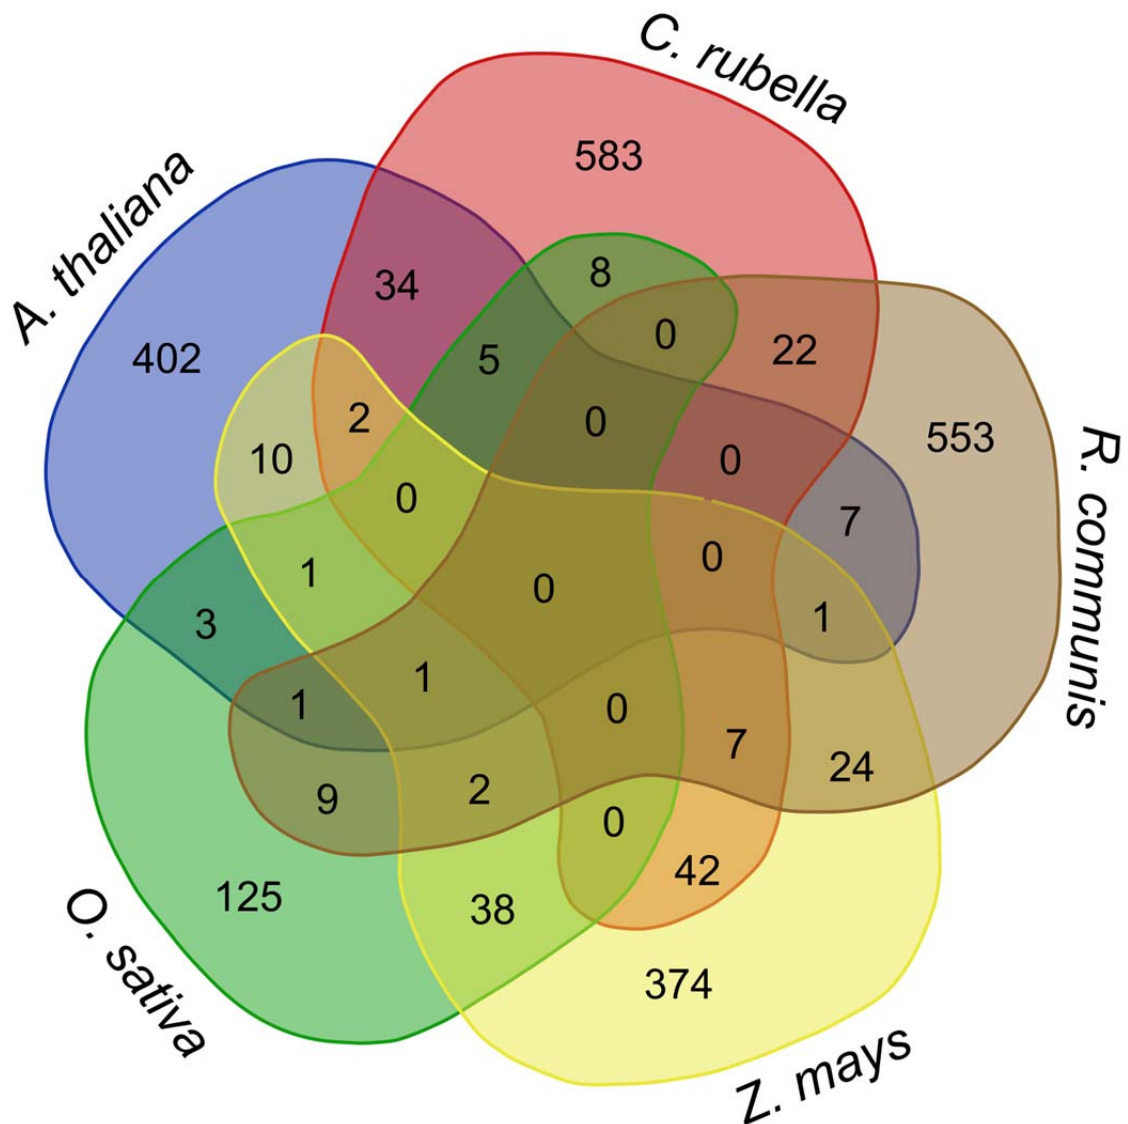

**Supplemental Figure 4. Cross comparison of imprinted genes in five different species.** Gene sets used in the comparison are limited to those genes where homologs have been identified in *A. thaliana* (blastn, e-value 1e-6). All homologs with a maximum e-value of 1e-6 were included in the comparison. Data of imprinted genes in different species are derived from the following sources: *A. thaliana* (Hsieh et al., 2011; Wolff et al., 2011; Gehring et al., 2011; Pignatta et al., 2014), rice (Luo et al., 2011), maize (Waters et al., 2013), and castor bean (Xu et al., 2014).

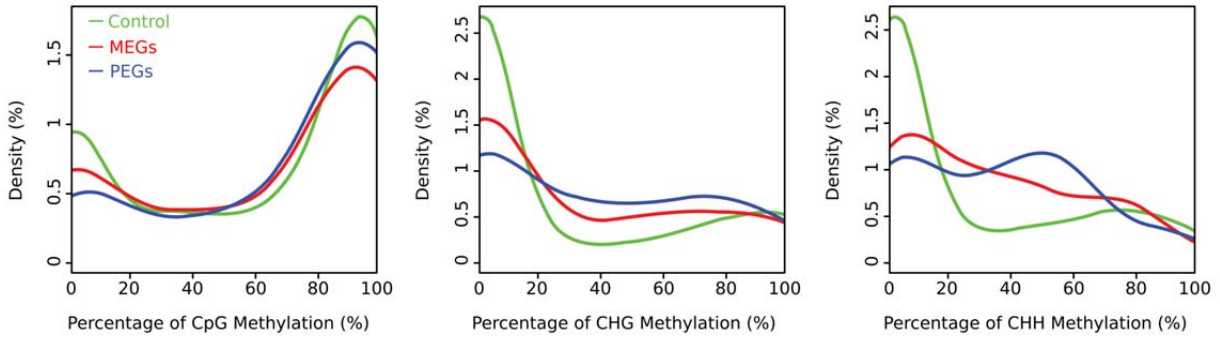

**Supplemental Figure 5. Frequency distribution of methylated regions within flanking regions of imprinted genes compared to control genes.** Flanking regions (1 kb) of MEGs, PEGs and endosperm expressed control genes were binned (100 bp) and the methylation level in each sequence context was determined for each bin. Only bins with at least five cytosines were considered. The bin with the highest methylation value for each gene was used to calculate the frequency methylation distribution. Genes in the control group were selected based on the presence of SNPs and detectable expression in the endosperm.

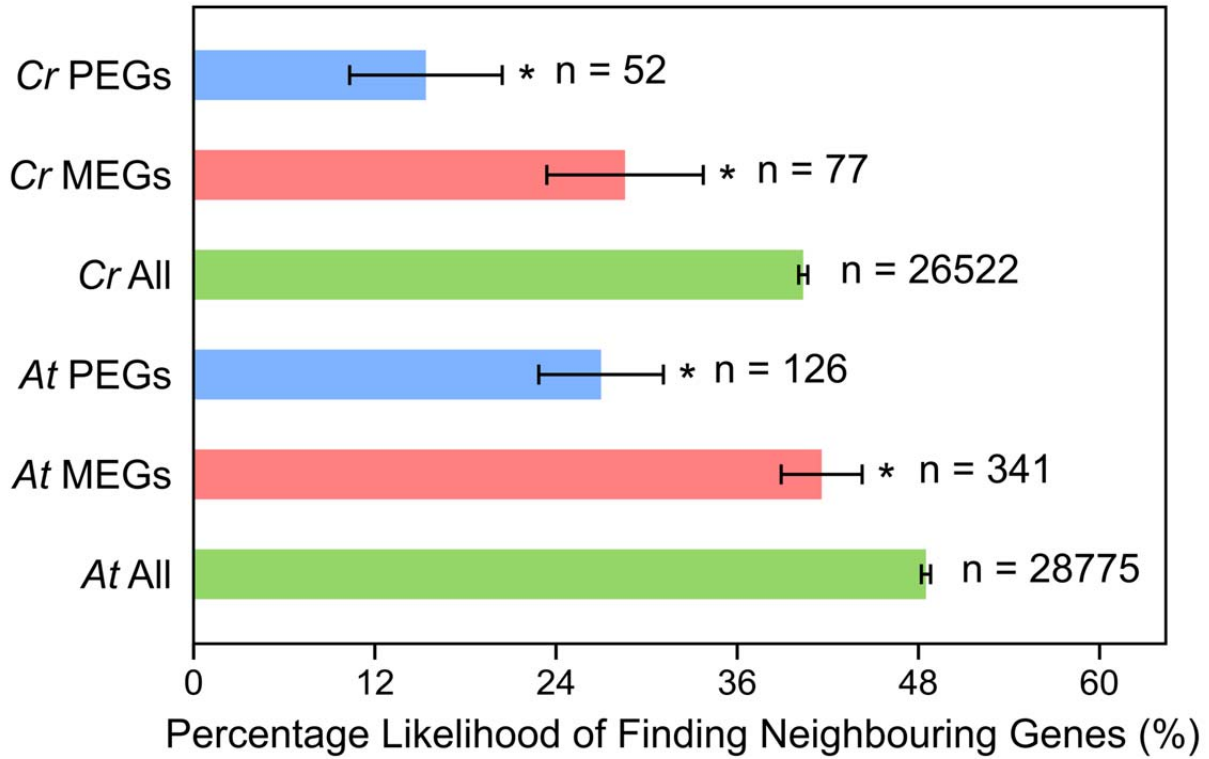

**Supplemental Figure 6. Likelihood of genes being located within 500 bp proximity of MEGs, PEGs or all genes of *C. rubella* (*Cr*) and *A. thaliana* (*At*).** Whiskers represent one standard deviation. Asterisks mark significantly decreased likelihood (hypergeometric test,  $p\text{-val} < 0.05$ ) of finding genes in the proximity of imprinted genes compared to all genes of the corresponding species.

**Supplemental Table 1. Properties of sequencing libraries used in the experiment.**

| <b>Genomic Library</b>        | <b>Mapped Reads to the Reference</b> | <b>Average Coverage</b>               | <b>Reads Mapped to Annotated Genes</b> |
|-------------------------------|--------------------------------------|---------------------------------------|----------------------------------------|
| Cr A                          | 60,952,946                           | 43.22                                 | 33,330,305                             |
| Cr B                          | 45,540,269                           | 32.45                                 | 24,498,833                             |
| <b>Transcriptomic Library</b> | <b>Mapped Reads to The Reference</b> | <b>Average Reads Mapped per Genes</b> | <b>Reads Mapped to Annotated Genes</b> |
| Cr Whole Seed RNA Control*    | 65,672,150                           | 845.94                                | 61,978,839                             |
| Cr A x Cr B Rep 1             | 118,995,845                          | 1797.37                               | 101,109,365                            |
| Cr B x Cr A Rep 1             | 119,297,773                          | 1868.99                               | 108,871,275                            |
| Cr A x Cr B Rep 2             | 137,143,848                          | 1668.66                               | 127,591,292                            |
| Cr B x Cr A Rep 2             | 135,108,495                          | 1651.77                               | 125,937,105                            |

\* from replicate 1 Cr x Cr (Rebernig et al., 2015).



**Supplemental Table 2. Enriched GO categories of conserved imprinted genes in *C. rubella* (Cr) and *A. thaliana* (At)**

\*: p-values (p-val) have been corrected using Benjamini-Hochberg method.

| <b>GO Category</b> | <b>Description</b>                                                             | <b>Cr.<br/>p-val*</b> | <b>At.<br/>p-val*</b> |
|--------------------|--------------------------------------------------------------------------------|-----------------------|-----------------------|
| Conserved MEGs     |                                                                                |                       |                       |
| GO:0045449         | P regulation of transcription                                                  | 0.0094                | 0.002                 |
| GO:0019219         | P regulation of nucleobase, nucleoside, nucleotide and nucleic acid metabolism | 0.0094                | 0.002                 |
| GO:0031323         | P regulation of cellular metabolism                                            | 0.0094                | 0.002                 |
| GO:0003700         | F transcription factor activity                                                | 0.0094                | 0.002                 |
| GO:0006350         | P transcription                                                                | 0.0094                | 0.002                 |
| GO:0019222         | P regulation of metabolism                                                     | 0.0094                | 0.002                 |
| GO:0051244         | P regulation of cellular physiological process                                 | 0.0102                | 0.0026                |
| GO:0050794         | P regulation of cellular process                                               | 0.0102                | 0.0026                |
| GO:0030528         | F transcription regulator activity                                             | 0.0102                | 0.0026                |
| GO:0050791         | P regulation of physiological process                                          | 0.0102                | 0.0026                |
| GO:0050789         | P regulation of biological process                                             | 0.0149                | 0.0043                |
| Conserved PEGs     |                                                                                |                       |                       |
| GO:0008757         | F S-adenosylmethionine-dependent methyltransferase activity                    | 0.0406                | 0.0087                |
| GO:0006259         | P DNA metabolism                                                               | 0.0406                | 0.0018                |
| GO:0006325         | P establishment and/or maintenance of chromatin architecture                   | 0.0406                | 0.0018                |
| GO:0006323         | P DNA packaging                                                                | 0.0406                | 0.0018                |
| GO:0007001         | P chromosome organization and biogenesis (sensu Eukaryota)                     | 0.0406                | 0.0018                |
| GO:0051276         | P chromosome organization and biogenesis                                       | 0.0406                | 0.0018                |
| GO:0008168         | F methyltransferase activity                                                   | 0.0406                | 0.0249                |
| GO:0016741         | F transferase activity, transferring one-carbon groups                         | 0.0406                | 0.0249                |

**Supplemental Table 3. Primer sequences used for validation of imprinted genes.**

All primer pairs were designed to amplify a single locus.

| Gene ID                                             | Homolog     | SNP Position | Cr A Genotype | Cr B Genotype | Forward Primer                | Reverse Primer                |
|-----------------------------------------------------|-------------|--------------|---------------|---------------|-------------------------------|-------------------------------|
| <b>MEGs tested for Sanger sequencing validation</b> |             |              |               |               |                               |                               |
| Carubv10001875m                                     | AT4G00220.1 | 16515343     | TT            | CC            | ATGAGCGGCAGCGGA<br>ATAAACCC   | GAGACGCAGCCGTAGATAG<br>G      |
| Carubv10006496m                                     | AT4G17870.1 | 8892373      | GG            | CC            | ATGCCTTCGGAGCTAA<br>CACC      | AATTCGTGAGCCTGTGCTCT          |
| Carubv10014802m                                     | AT2G04240.2 | 9694159      | TT            | CC            | CAGAAGACCACCAGC<br>TTTCTC     | CAAATAACTCTCTTTCTTGC<br>AC    |
| Carubv10024888m                                     | AT2G34880.1 | 9637481      | TT            | CC            | ATCGAAATTTCAAAGA<br>CGCCTA    | ATGTTTTCTCATCGCCCTCTC         |
| Carubv10016646m                                     | AT3G47950.1 | 7747627      | CC            | TT            | TATACCTGCAAGTCAG<br>TATTATCAG | GACCATGGAGCGTTCTCTGT<br>GCG   |
| Carubv10001038m                                     | AT4G09650.1 | 12711790     | TT            | GG            | CAAACACTACTGCATCT<br>GGTTC    | CATGTGCTTGCCATTAGCAG          |
| Carubv10014524m                                     | AT3G14770.1 | 5063987      | AA            | GG            | CTGGTCATGATCGAAG<br>GATGG     | TAAAACCGCGATGAAAGGT<br>C      |
| Carubv10025240m                                     | AT2G23580.2 | 1179435      | AA            | CC            | AAAGGTTTGTGCTCGT<br>CCAT      | CTAGAGGGCGATCAGGTGT<br>C      |
| Carubv10007482m                                     | AT5G40430.1 | 16106240     | TT            | GG            | AAAACGTGGGCTACTC<br>TCGATG    | TCATCATCATCCACGGGTTT          |
| Carubv10026752m                                     | AT5G61430.1 | 10979408     | GG            | CC            | AATCGCTTGTGGGAT<br>GAAG       | GAGAAGCAGGGCACGTAGA<br>C      |
| <b>PEGs tested for Sanger sequencing validation</b> |             |              |               |               |                               |                               |
| Carubv10020400m                                     | AT1G70560.1 | 10073861     | CC            | AA            | CGCTGATTTCACTCTC<br>ACCA      | ATGATCTAGAGGTCAATGCT<br>TC    |
| Carubv10011407m                                     | AT1G17770.1 | 6158407      | TT            | GG            | CTCATTTGTTTCGGGT<br>GCTGG     | GTCCTGCAATTAGCCTCAGC          |
| Carubv10022676m                                     | AT2G32370.1 | 8528371      | AA            | CC            | GAATACTGAACGTAC<br>GATCG      | ACAGCTTCTCGGAGCCCTAT<br>G     |
| Carubv10017919m                                     | AT3G29575.4 | 3677370      | GG            | AA            | TGAGTAGGACTTGTTT<br>GATGC     | CCAGAGGAACCACTTCCAG<br>A      |
| Carubv10019919m                                     | AT5G39550.1 | 7693760      | TT            | AA            | TGTTCAAGTTCCTTGC<br>GACG      | CAGTCAAAGTCACATCAGCC<br>TC    |
| Carubv10006293m                                     | AT4G31900.2 | 3284332      | CC            | GG            | TTGCTGAGGCAGAAC<br>ATGAC      | CAGCTACAAAGCTCGCTCCT          |
| Carubv10011676m                                     | AT1G28370.1 | 9749192      | CC            | GG            | TCAACAACAACAACCT<br>CGGA      | TAGTTCTCAGGTGGAGGAG<br>GG     |
| Carubv10026429m                                     | AT5G57180.3 | 9331482      | CC            | TT            | GTCTTCCCAAACCCA<br>ATTAG      | TTCCTCGTTGAGATTGCGAT<br>GGATG |
| Carubv10010527m                                     | AT1G32540.3 | 11453189     | AA            | CC            | GTACAAGTGGACAGA<br>GCCAGTTAG  | TCACATCAGGAGTCGTGCTC          |
| Carubv10007586m                                     | AT4G14580.1 | 10545469     | AA            | CC            | TATACTGCACCGGAAG<br>TGATTG    | ATCAGACCGAACCTCAAGA<br>G      |
